# Supplementary material for: The relation between the distance from mandibular retromolar foramen to mandibular angle and lower third molar using panoramic radiographs
Source: Research Square preprint supplement (doi:10.21203/rs.3.rs-334156/v1), 2021-04-09
Supplement: Supplementary file 1 [file a815a4bb0407fe3e72ea4e9d.docx]

| **Table N.3 – the relation between jaw width and gender** | | | | | | | |
| --- | --- | --- | --- | --- | --- | --- | --- |
|  | **gender** | **count** | **mean** | **SD** | **SE** | **P-value** | **SIG** |
| **Measuring the width of the lower jaw on the right side** | **Male** | 56 | 25.6571 | 2.51352 | .33588 | 0.000 | Significant difference |
| **Female** | 36 | 28.5889 | 3.84491 | .64082 |
| **Measurement of the width of the lower jaw on the left side** | **Male** | 56 | 27.0571 | 2.45719 | .32836 | 0.000 | Significant difference |
| **Female** | 36 | 29.7833 | 3.80657 | .63443 |
